# Supplementary material
Source: PubMed Central journal article supplement (PMC4440437)
Supplement: thnov05p0787s1.pdf [file thnov05p0787s1.pdf]

# A Prodrug-type, MMP-2-targeting Nanoprobe for Tumor Detection and Imaging

Yaping Wang,<sup>a,b</sup> Tingting Lin,<sup>a,b</sup> Wenyuan Zhang,<sup>b</sup> Yifan Jiang,<sup>b</sup> Hongyue Jin,<sup>b</sup> Huining He,<sup>a</sup> Victor C. Yang,<sup>a,c</sup> Yi Chen,<sup>b</sup> and Yongzhuo Huang<sup>\*b</sup>

<sup>a</sup> Tianjin Key Laboratory on Technologies Enabling Development of Clinical Therapeutics and Diagnostics, School of Pharmacy, Tianjin Medical University, Tianjin 300070, China.

<sup>b</sup> Shanghai Institute of Materia Medica, Chinese Academy of Sciences, 501 Hai-ke, Shanghai 201203, China. Tel: +86-21-2023-1000 ext 1401; E-mail: yzhuang@simm.ac.cn

<sup>c</sup> University of Michigan, College of Pharmacy, 428 Church St, Ann Arbor, MI 48108, USA

## Supplementary Materials

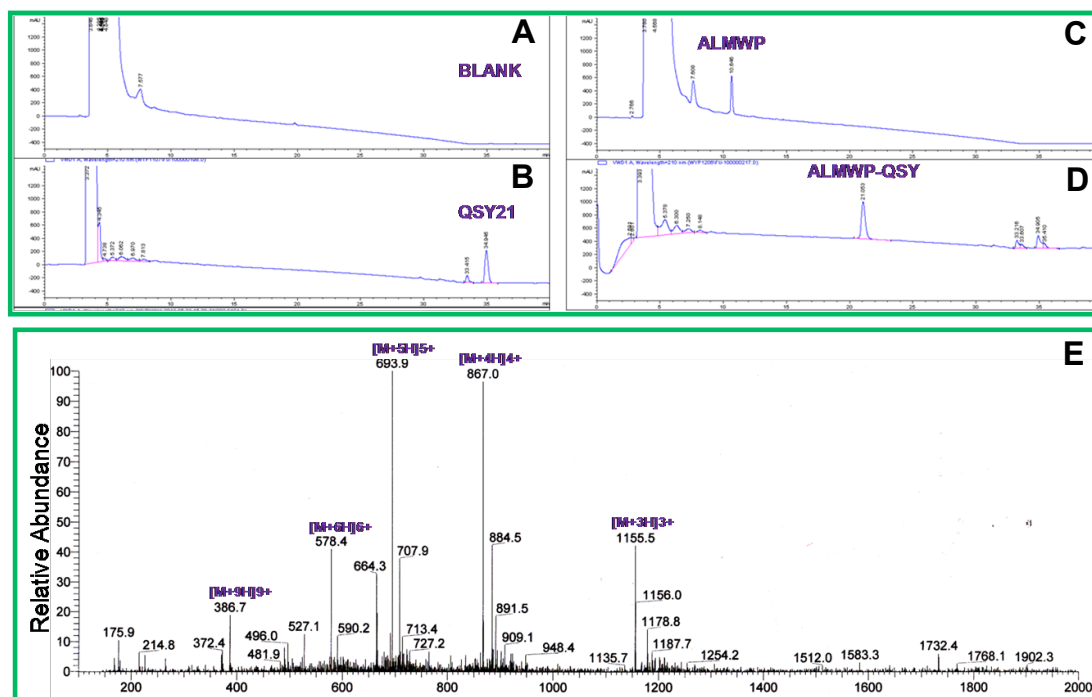

Figure S1. Characterization of the ALMWP-QSY (MW 3463) by HPLC (A-D) and mass spectroscopy (E).

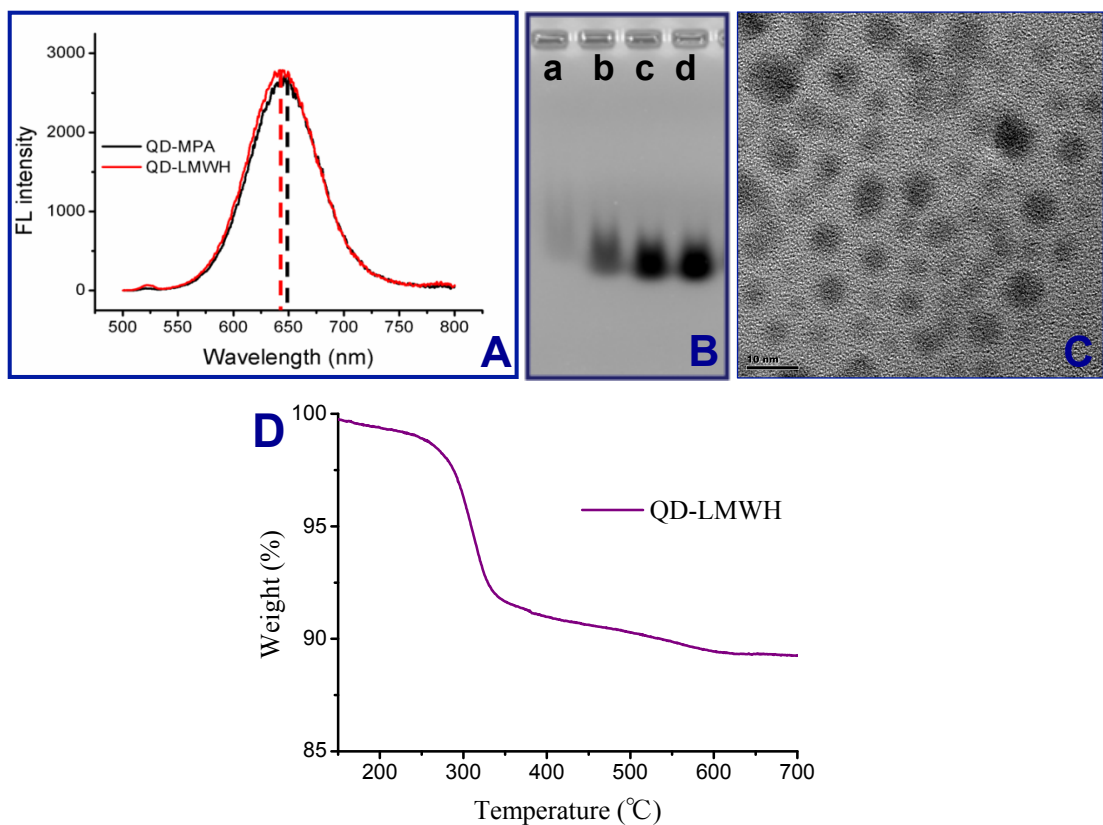

**Figure S2.** Characterization of the QD-LMWH. (A) Fluorescence spectrum of the QD and QD-LMWH. (B) Gel electrophoresis of (a) QD, (b-d) QD-LMWH with the increasing ratio of modified LMWH. (C) TEM of the QD-LMWH. (D) Thermal gravimetric analysis of QD-LMWH (total weight loss about 11%, indicating the LMWH modification ratio).

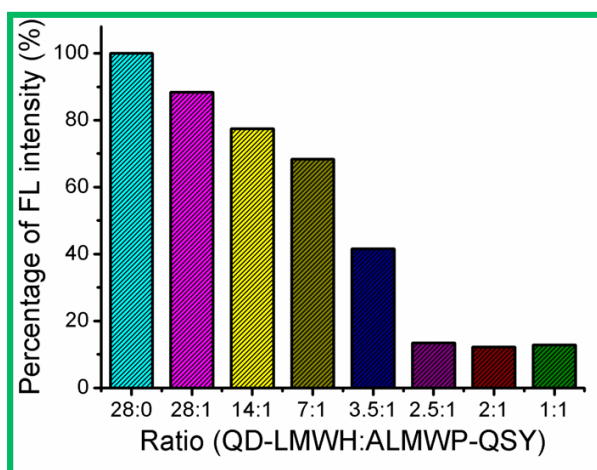

**Figure S3.** Fluorescence quench caused by the formation of nanoprobe (QD-LMWH/LMWP-QSY), and quench efficiency related to the increase of the QSY amount.

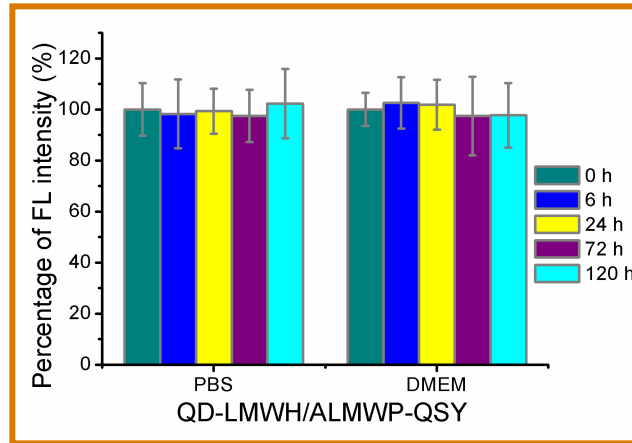

**Figure S4.** Stability of nanoprobes in PBS or complete DMEM (containing 10% FBS). Little fluorescence activation was found in the presence or absence of serum.

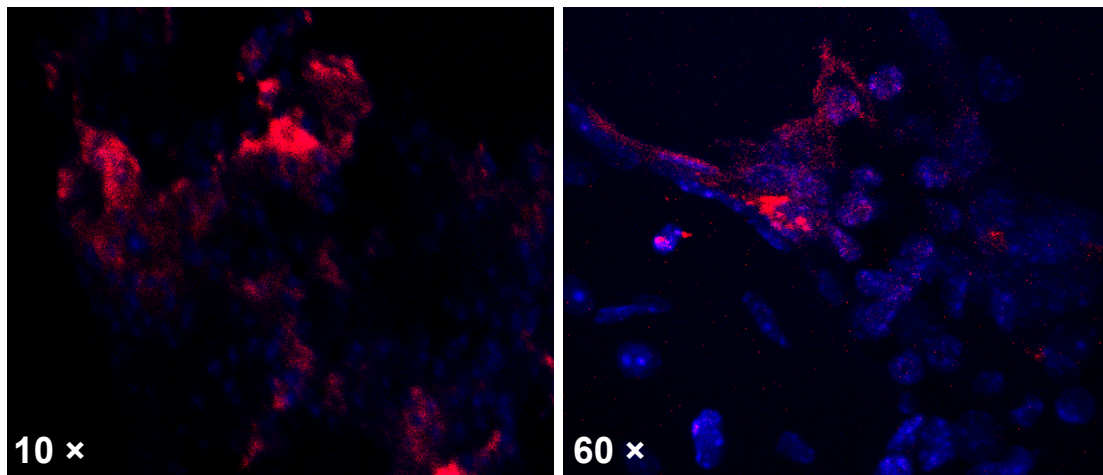

**Figure S5.** Fluorescence imaging of the brain tumor cryosection (red: activated nanoprobes; blue: DAPI staining) from the mouse model with orthotopic brain tumor after tail vein injection of the nanoprobes.
